# Supplementary material
Source: PubMed Central journal article supplement (PMC9947923)
Supplement: NEJMoa2211031_appendix.pdf [file NEJMoa2211031_appendix.pdf]

## Supplementary Appendix

Supplement to: Muñoz FM, Sher LD, Sabharwal C, et al. Evaluation of BNT162b2 Covid-19 vaccine in children younger than 5 years of age. *N Engl J Med* 2022;387:621-34. DOI: 10.1056/NEJMoa2211031

This appendix has been provided by the authors to give readers additional information about the work.

## SUPPLEMENTARY APPENDIX

|                                                                                                                                                                                                                                                                                  |    |
|----------------------------------------------------------------------------------------------------------------------------------------------------------------------------------------------------------------------------------------------------------------------------------|----|
| List of Investigators .....                                                                                                                                                                                                                                                      | 2  |
| Eligibility Criteria .....                                                                                                                                                                                                                                                       | 5  |
| Ethical Conduct of the Study .....                                                                                                                                                                                                                                               | 5  |
| Phase 1 Review of Safety Data and Stopping Rules.....                                                                                                                                                                                                                            | 5  |
| Seroresponse Definition.....                                                                                                                                                                                                                                                     | 6  |
| Immunobridging Analysis .....                                                                                                                                                                                                                                                    | 6  |
| Additional Procedures for Monitoring of Potential Myocarditis or Pericarditis.....                                                                                                                                                                                               | 7  |
| Determination of SARS-CoV-2 Infection, COVID-19, and MIS-C.....                                                                                                                                                                                                                  | 7  |
| Calculation of Immunogenicity Parameters.....                                                                                                                                                                                                                                    | 8  |
| Sample Size Calculations.....                                                                                                                                                                                                                                                    | 9  |
| Dose 3 Evaluable Immunogenicity Population and Timing of Dose 3 Administration.....                                                                                                                                                                                              | 9  |
| Figure S1. Participant flow in the phase 1 study among participants (A) 6 months–<2 years of age and (B) 2–4 years of age.....                                                                                                                                                   | 10 |
| Figure S2. Local reactions and systemic events in participants (A) 6 months–<2 years of age and (B) 2–4 years of age reported 7 days after administration of BNT162b2 in the phase 1 study .....                                                                                 | 11 |
| Figure S3. Geometric mean and 95% CI for neutralizing titers 7 days after dose 2 in phase 1 participants 6 months–11 years of age and 1 month after dose 2 for participants 12–25 years of age from a previous phase 2/3 study .....                                             | 12 |
| Figure S4. Geometric means of ancestral SARS-CoV-2 neutralizing titers for participants 6 months–4 years and 16–25 years of age among BNT162b2 recipients.....                                                                                                                   | 13 |
| Figure S5. Serum SARS-CoV-2 neutralization titers for the Omicron BA.1 sublineage after dose 3 in participants 6 months–<2 years, 2–4 years, and 18–50 years of age without evidence of prior SARS-CoV-2 infection who received dose 3 approximately 3 months after dose 2 ..... | 14 |
| Table S1. Study populations .....                                                                                                                                                                                                                                                | 15 |
| Table S2. Demographic characteristics of phase 1 participants* .....                                                                                                                                                                                                             | 16 |
| Table S3. Representativeness of phase 2/3 study participants* .....                                                                                                                                                                                                              | 17 |
| Table S4. Severity scale for local reactions and systemic events .....                                                                                                                                                                                                           | 18 |
| Table S5. Phase 1 participants reporting $\geq 1$ adverse event from dose 1 to 1 month after dose 2.....                                                                                                                                                                         | 19 |
| Table S6. Phase 2/3 participants reporting $\geq 1$ adverse event from dose 1 to 1 month after dose 3.....                                                                                                                                                                       | 20 |
| Table S7. Vaccine efficacy by variant of concern in phase 2/3 participants based on first COVID-19 occurrence from 7 days after dose 3 .....                                                                                                                                     | 21 |

## List of Investigators

| Name                                           | Institute                                                                             | Location                |
|------------------------------------------------|---------------------------------------------------------------------------------------|-------------------------|
| Acevedo, Armando                               | Acevedo Clinical Research Associates                                                  | Miami, FL, USA          |
| Adkinson, Rachel*                              | Johns Hopkins University Center for Immunization Research                             | Baltimore, MD, USA      |
| Anderson, Evan                                 | Emory Children's Center Illness POD                                                   | Atlanta, GA, USA        |
|                                                | Emory University School of Medicine                                                   | Atlanta, GA, USA        |
| Armiñana, Angels Uljed                         | EAP Centelles                                                                         | Barcelona, Spain        |
| Arora, Samir                                   | Aventiv Research Inc                                                                  | Columbus, OH, USA       |
| Baker, Jeffrey                                 | Clinical Research Prime                                                               | Idaho Falls, ID, USA    |
| Barnett, Elizabeth                             | Boston Medical Center                                                                 | Boston, MA, USA         |
| Bocchini, Claire†                              | Texas Children's Hospital and Baylor College of Medicine                              | Houston, TX, USA        |
| Bollyky, Jenna‡                                | Clinical & Translational Research Unit (CTRU) & Spectrum BioBank, Stanford University | Palo Alto, CA, USA      |
| Boppana, Suresh                                | University of Alabama at Birmingham - School of Medicine                              | Birmingham, AL, USA     |
| Caserta, Mary                                  | University of Rochester Medical Center                                                | Rochester, NY, USA      |
| Casey, Janet                                   | Rochester Clinical Research, Inc                                                      | Rochester, NY, USA      |
| Chalhoub, Fadi                                 | Clinical Neuroscience Solutions, Inc                                                  | Jacksonville, FL, USA   |
| Conejo, Pablo Rojo                             | Hospital Universitario 12 de Octubre                                                  | Madrid, Spain           |
| Czajka, Hanna                                  | Centrum Badań Klinicznych Jagiellońskie                                               | Krakow, Poland          |
| Davis, Christopher                             | Tribe Clinical Research, LLC                                                          | Greenville, SC, USA     |
| Day, J Chris (replaced Pahud, Barbara)         | Children's Mercy Hospital                                                             | Kansas City, MO, USA    |
| De Valle, Oscar                                | West Houston Clinical Research Service                                                | Houston, TX, USA        |
| Dever, Michael                                 | Clinical Neuroscience Solutions                                                       | Orlando, FL, USA        |
| Domachowske, Joseph                            | SUNY Upstate Medical University                                                       | Syracuse, NY, USA       |
| Eder, Frank                                    | Meridian Clinical Research, LLC                                                       | Binghamton, NY, USA     |
| Englund, Janet                                 | Seattle Children's Hospital                                                           | Seattle, WA, USA        |
| Feijoo, Brittany‡                              | Johns Hopkins University Center for Immunization Research                             | Baltimore, MD, USA      |
| Fergie, Jaime                                  | Driscoll Children's Hospital                                                          | Corpus Christi, TX, USA |
| Frenck Jr, Robert‡                             | Cincinnati Children's Hospital Medical Center                                         | Cincinnati, OH, USA     |
| Guasch, Clàudia Fortuny                        | Hospital Sant Joan de Déu                                                             | Barcelona, Spain        |
| Hand, Jonathan (previously Garcia-Diaz, Julia) | Ochsner Clinic Foundation                                                             | New Orleans, LA, USA    |
| Hartman, Aaron                                 | Virginia Research Center                                                              | Midlothian, VA, USA     |
| Kantele, Anu                                   | Meilahti Vaccine Research Center (MeVac)                                              | Helsinki, Finland       |
| Klein, Terry                                   | Alliance for Multispecialty Research, LLC                                             | Wichita, KS, USA        |
| Kokko, Satu                                    | Tampere University/Oulu Vaccine Research Clinic                                       | Oulu, Finland           |

---

|                                            |                                                                                       |                                                                    |
|--------------------------------------------|---------------------------------------------------------------------------------------|--------------------------------------------------------------------|
| Kopinska, Elzbieta                         | MICS Centrum Medyczne Torun                                                           | Torun, Poland                                                      |
| Korbal, Piotr                              | In-Vivo Spółka Z Ograniczoną                                                          | Bydgoszcz, Poland                                                  |
| Korkowski, Sarah‡                          | Seattle Children’s Hospital                                                           | Seattle, WA, USA                                                   |
| Koski, Susanna                             | Tampere University/Helsinki South Vaccine Research Clinic                             | Helsinki, Finland                                                  |
| Li, Simon                                  | Rutgers University                                                                    | New Brunswick, NJ, USA                                             |
| López, José García-Sicilia                 | Hospital Universitario HM Montepríncipe                                               | Madrid, Spain                                                      |
| Majda-Stanisławska, Ewa                    | GRAVITA Diagnostyka i Leczenie niepłodności                                           | Lodz, Poland                                                       |
| Maldonado, Yvonne                          | Clinical & Translational Research Unit (CTRU) & Spectrum BioBank, Stanford University | Palo Alto, CA, USA                                                 |
| Marshall, Gary                             | Novak Center for Children’s Health                                                    | Louisville, KY, USA                                                |
| Martinón-Torres, Federico                  | CHUS - Hospital Clínico Universitario de Santiago                                     | Santiago de Compostela, Spain                                      |
| Meyer, Jay                                 | Meridian Clinical Research, LLC                                                       | Lincoln, NE, USA                                                   |
| Mirani, Gayatri†                           | Texas Children’s Hospital and Baylor College of Medicine                              | Houston, TX, USA                                                   |
| Montañà, Josep-Lluís Arimany               | Hospital Universitari General de Catalunya                                            | Barcelona, Spain                                                   |
| Muñoz, Flor                                | Texas Children’s Hospital - Clinical Research Center                                  | Houston, TX, USA                                                   |
| Nachman, Sharon                            | Advanced Specialty Care<br>Clinical Research Center<br>Stony Brook University         | Commack, NY, USA<br>East Setauket, NY, USA<br>Stony Brook, NY, USA |
| Natalini Martínez, Silvina                 | Hospital HM Puerta del Sur                                                            | Mostoles, Spain                                                    |
| Ogbuagu, Onyema                            | Yale Center for Clinical Investigation                                                | New Haven, CT, USA                                                 |
| Paavola, Pauliina                          | Tampere University/Kokkola Vaccine Research Clinic                                    | Kokkola, Finland                                                   |
| Patel, Nehali                              | St. Jude Children’s Research Hospital                                                 | Memphis, TN, USA                                                   |
| Paulsen, Grant                             | Cincinnati Children’s Hospital Medical Center                                         | Cincinnati, OH, USA                                                |
| Ramchandra, Mahalakshmi                    | Bay Colony Pediatrics                                                                 | Dickinson, TX, USA                                                 |
| Riesenberg, Robert                         | Atlanta Center for Medical Research                                                   | Atlanta, GA, USA                                                   |
| Ruedebusch, Paula‡                         | Seattle Children’s Hospital                                                           | Seattle, WA, USA                                                   |
| Senders, Shelly                            | Senders Pediatrics                                                                    | South Euclid, OH, USA                                              |
| Seppa, Ilkka                               | Tampere University/Turku Vaccine Research Clinic                                      | Turku, Finland                                                     |
| Seppa, Ilkka (previously Sipila, Marjaana) | Tampere University/Tampere Vaccine Research Clinic                                    | Tampere, Finland                                                   |
| Sexter, Joanna                             | Meridian Clinical Research                                                            | Washington, DC, USA                                                |
| Sharp, Stephan                             | Clinical Research Associates Inc                                                      | Nashville, TN, USA                                                 |
| Sher, Lawrence                             | Peninsula Research Associates                                                         | Rolling Hills Estates, CA, USA                                     |
| Simonsen, Kari                             | Children’s Hospital & Medical Center                                                  | Omaha, NE, USA                                                     |
| Slechta, Stacy                             | Alliance for Multispecialty Research, LLC                                             | Newton, KS, USA                                                    |

---

---

|                              |                                                                         |                          |
|------------------------------|-------------------------------------------------------------------------|--------------------------|
| Smith, Michael†‡             | Duke Vaccine and Trials Unit                                            | Durham, NC, USA          |
| Smith, Yvonne                | Rophe Adult and Pediatric Medicine/SKYCRNG                              | Union City, GA, USA      |
| Stryczynska-Kazubska, Joanna | Rodzinne Centrum Medyczne LUBMED                                        | Lubon, Poland            |
| Suryadevara, Manika‡         | SUNY Upstate Medical University                                         | Syracuse, NY, USA        |
| Talaat, Kawsar               | Johns Hopkins University Center for Immunization Research               | Baltimore, MD, USA       |
| Ukkonen, Benita              | Tampere University/Espoo Vaccine Research Clinic                        | Espoo, Finland           |
| Valdivieso, Mariano Miranda  | Hospital de Antequera                                                   | Antequera, Spain         |
| Vanchiere, John              | LSUHSC-Shreveport Clinical Trials Office                                | Shreveport, LA, USA      |
| Walter, Emmanuel             | Duke Vaccine and Trials Unit                                            | Durham, NC, USA          |
| Wiedermann, Bernhard         | Children's National Medical Center                                      | Washington, DC, USA      |
| Wisman Jr, Paul              | Pediatric Associates of Charlottesville, PLC                            | Charlottesville, VA, USA |
|                              | Pediatric Research of Charlottesville, LLC                              | Charlottesville, VA, USA |
| Yudovich, Martin             | Pediatric Associates                                                    | Houston, TX, USA         |
| Zerbini, Cristiano           | CEPIC – Centro Paulista de Investigação Clínica e Serviços Médicos Ltda | São Paulo, Brazil        |

---

\* Site coordinator

† Co-investigator

‡ Sub-investigator

## **Eligibility Criteria**

The study included healthy participants; those with pre-existing stable disease (ie, disease not requiring a significant change in therapy or hospitalization for worsening disease in the 6 weeks before enrolment) could be included. Exclusion criteria in the phase 1/2/3 portions of the study included receipt of treatments to prevent COVID-19, previous or current multisystem inflammatory syndrome in children (MIS-C) diagnosis, history of severe adverse reaction with a vaccine or any component of the study intervention, and immunodeficiency, autoimmune disease, or conditions associated with prolonged bleeding. In the phase 1 portion of the study, exclusion criteria additionally included past clinical (based on COVID-19 symptoms/signs alone if a SARS-CoV-2 nucleic acid amplification test [NAAT] result was unavailable) or virologic (based on COVID-19 symptoms/signs and a positive SARS-CoV-2 NAAT result) COVID-19 diagnosis, as well as known HIV or hepatitis C or B virus infection.

## **Ethical Conduct of the Study**

This study was conducted in accordance with the study protocol and with consensus ethical principles derived from international guidelines including the Declaration of Helsinki, Council for International Organizations of Medical Sciences Ethical Guidelines, International Conference on Harmonisation Guidelines for Good Clinical Practice, and applicable laws and regulations, including applicable privacy laws. The study protocol and any amendments, informed consent documents, and other relevant documents were approved by institutional review board/ethics committees (IRB/EC) before the study was initiated. Before any study activity, written informed consent was obtained from the participants' parents/legal guardians.

## **Phase 1 Review of Safety Data and Stopping Rules**

An Internal Review Committee (IRC) reviewed safety and immunogenicity data to permit dose level escalation in each age group, and to select the dose level to proceed to phase 2/3.

Stopping rules were applied to all phase 1 participants based on review of adverse event (AE) and reactogenicity (electronic diary) data, until the start of phase 2/3 or 30 days after the last dose in phase 1 in each age group. These data were continuously monitored by the investigators and sponsor to allow prompt identification of any event contributing to the stopping rule.

The stopping rule criteria for each BNT162b2 dose level included: (1) if a participant developed a serious AE as assessed by the investigator as possibly related to the vaccine or for which there was no

alternative, plausible, attributable cause; (2) if a participant developed a grade 4 local reaction or systemic event as assessed as possibly related by the investigator, or for which there was no alternative, plausible, attributable cause; (3) if any participant developed a fever  $>40^{\circ}\text{C}$  for  $\geq 1$  daily measurement after vaccination as assessed as possibly related by the investigator, or for which there was no alternative, plausible, attributable cause; (4) if two participants within the same age group reported the same or similar severe AEs after vaccination as assessed by the investigator as possibly related to the vaccine or for which there was no alternative, plausible, or attributable cause; and (5) if any participant died or required intensive care unit (ICU) admission because of SARS-CoV-2 infection.

If a stopping rule was met, the IRC was to consider all data; randomization and vaccine administration for all dose levels in the affected age group were to be paused; and the Data Monitoring Committee was to review all appropriate data. All other routine study conduct activities were to continue for all vaccinated participants.

### **Seroresponse Definition**

Seroresponse was defined as an increase in titer of  $\geq 4$  times that of baseline (before dose 1), or by titer  $\geq 4$  times the lower limit of quantitation (LLOQ) if the baseline measurement was  $< \text{LLOQ}$ .

### **Immunobridging Analysis**

#### Post-dose 2 immunobridging assessment

The pediatric post-dose 2 immunobridging subset included approximately 300 participants in the BNT162b2 group and 150 participants in the placebo group for each pediatric age group (ie, 6 months– $< 2$  years and 2–4 years of age). Comparator data were from a randomly selected subset of participants 16–25 years of age from Study C4591001 and included approximately 300 participants in the BNT162b2 group and 50 in the placebo group. Different sets of 16–25-year-old participants were selected for each of the pediatric age group immunobridging analyses.

#### Post-dose 3 immunobridging assessment

The pediatric post-dose 3 immunobridging subset included the first approximately 200 participants in each pediatric age group (ie, 6 months– $< 2$  years and 2–4 years of age) who received dose 3 of BNT162b2 3- $\mu\text{g}$  and 100 who received placebo, completed the 1 month after dose 3 visit, and had 1 month after dose 3 blood sample collection (this included a non-overlapping group of participants relative to the prior post-dose 2 immunobridging analyses). The comparator group of young adults

16–25 years of age from Study C4591001 included a random subset of 200 participants who received dose 2 of BNT162b2 30- $\mu$ g and 50 who received placebo (this included a different group of young adults relative to the prior post-dose 2 immunobridging analyses).

### **Additional Procedures for Monitoring of Potential Myocarditis or Pericarditis**

Any study participant who reported acute chest pain, shortness of breath, palpitations, or any other symptom(s) that might be indicative of myocarditis or pericarditis within 4 weeks after a study vaccination was evaluated, preferably by a cardiologist, for possible myocarditis or pericarditis.

### **Determination of SARS-CoV-2 Infection, COVID-19, and MIS-C**

Surveillance for potential COVID-19 and MIS-C cases occurred throughout a participant's involvement in the study. Participants who developed an acute illness were considered to have potential COVID-19. In this circumstance, assessments were to include nasal (anterior nares) swab sample collection by site staff personnel or a participant's parent/guardian, which were tested at a central laboratory using the reverse transcription–polymerase chain reaction (RT-PCR) test (Cepheid) or other equivalent nucleic acid amplification–based test (NAAT), to detect SARS-CoV-2. Clinical information and results from local standard-of-care tests were also assessed. The case definition used the central laboratory NAAT result. If no central laboratory result was available, a local NAAT result could be used if it was obtained using either the Cepheid Xpert Xpress SARS-CoV-2, Roche Cobas SARS-CoV-2 Real-Time RT-PCR test, or the Abbott Molecular/RealTime SARS-CoV-2 assay.

SARS-CoV-2–related cases and SARS-CoV-2–related severe cases were documented (for both, the onset date of the case was the date that symptoms were first experienced by the participant; if new symptoms were reported within 4 days after resolution of all previous symptoms, they were considered as part of a single illness).

The definition of confirmed COVID-19 included the presence of  $\geq 1$  symptom (ie, fever, new or increased cough, new or increased shortness of breath, chills, new or increased muscle pain, new loss of taste or smell, sore throat, diarrhea [ $\geq 3$  loose stools per day], vomiting, and inability to eat/poor feeding) and being SARS-CoV-2 NAAT-positive during, or within 4 days before or after, the symptomatic period (either at the central laboratory or at a local testing facility using an acceptable test) and which triggered a potential COVID-19 illness visit.

Diagnosis of severe COVID-19 included the US Centers for Disease Control and Prevention (CDC) definition (<https://www.cdc.gov/coronavirus/2019-ncov/need-extra-precautions/people-with->



[medicalconditions.html](#)), and the protocol-defined definition of confirmed COVID-19, which required the presence of  $\geq 1$  of the following that triggered a potential COVID-19 illness visit:

- (1) clinical signs at rest indicative of severe systemic illness (eg, respiratory rate and heart rate as shown in the following table,  $\text{SpO}_2 \leq 92\%$  on room air or  $>50\%$   $\text{FiO}_2$  to maintain  $\geq 92\%$ , or  $\text{PaO}_2/\text{FiO}_2 < 300$  mmHg)

| Participant age | Respiratory rate | Heart rate |
|-----------------|------------------|------------|
| 6–<9 months     | >61              | >168       |
| 9–<12 months    | >58              | >161       |
| 12–<18 months   | >53              | >156       |
| 18–<24 months   | >46              | >149       |
| 2–<3 years      | >38              | >142       |
| 3–<4 years      | >33              | >136       |
| 4–<6 years      | >29              | >131       |

- (2) respiratory failure (ie, needing high-flow oxygen, including continuous positive airway pressure, bilevel positive airway pressure, noninvasive ventilation, mechanical ventilation, or extracorporeal membrane oxygenation)
- (3) evidence of shock or cardiac failure (ie, systolic blood pressure  $< 70 + [\text{age in years} \times 2]$  mmHg for age up to 10 years or requiring vasoactive drugs to maintain blood pressure in the normal range)
- (4) significant acute renal failure (ie, serum creatinine  $\geq 2 \times$  upper limit of normal [ULN] for age or 2-fold increase in baseline creatinine)
- (5) significant gastrointestinal/hepatic failure (ie, total bilirubin  $\geq 4$  mg/dL or alanine transaminase  $2 \times$  ULN for age)
- (6) significant neurological dysfunction (ie, Glasgow Coma Scale score  $\leq 11$  or acute change in mental status with a decrease in Glasgow Coma Scale score  $\geq 3$  points from abnormal baseline)
- (7) intensive care unit admission
- (8) death

Confirmed MIS-C was per the CDC MIS-C case definition (available from: [www.cdc.gov/mis-c/hcp/](http://www.cdc.gov/mis-c/hcp/) [accessed August 29, 2022]).

### Calculation of Immunogenicity Parameters

Geometric mean titers (GMTs) were derived by exponentiating the mean in logarithmically transformed neutralizing titer values. Geometric mean ratios (GMRs) were derived by exponentiating the mean of the difference (6-months–<2-year-olds minus 16–25-year-olds, and 2–4-year-olds minus 16–25-year-olds), in logarithmically transformed neutralizing titer values. Associated 2-sided 95% CIs for GMTs and GMRs were obtained by calculating confidence limits for the transformed values

based on the Student *t* distribution and then exponentiating the limits. Geometric mean fold rises (GMFRs) were calculated for participants with non-missing values at both time points by exponentiating the mean of the difference (later time point minus earlier time point) of logarithmically transformed assay results. Associated 2-sided 95% CIs were obtained using the Student *t* distribution for the mean difference and exponentiating the confidence limits.

### **Sample Size Calculations**

A sample size of 225 evaluable participants in each age group would provide 90.4% power to demonstrate immunobridging based on GMR and 92.6% power based on seroresponse rate after dose 2. A sample size of 130 evaluable BNT162b2 recipients in each age group would provide 93.3% power to demonstrate immunobridging based on GMR and 90.4% power based on seroresponse rate after dose 3.

### **Dose 3 Evaluable Immunogenicity Population and Timing of Dose 3 Administration**

The dose 3 evaluable immunogenicity population included 204 participants 2–4 years of age who received three BNT162b2 doses and 92 who received placebo, of whom 143 and 59, respectively, were without evidence of prior SARS-CoV-2 infection  $\leq 1$  month after dose 3. In participants 6 months–<2 years of age, 132 and 67 received three BNT162b2 and placebo doses, respectively, of whom 82 and 49 were without evidence of prior SARS-CoV-2  $\leq 1$  month after dose 3. The comparator group of young adults included 183 participants in the BNT162b2 30- $\mu$ g group and 45 participants in the placebo group of the Study C4591001 dose 2 evaluable immunogenicity population, of whom 170 and 38 participants, respectively, were without evidence of prior SARS-CoV-2 infection  $\leq 1$  month PD2. All children 6 months–4 years of age in the immunobridging subset received all three 3- $\mu$ g doses of BNT162b2. All comparator young adults 16–25 years of age received two 30- $\mu$ g doses of BNT162b2. Most pediatric and young adults (>85%) received dose 2 within the protocol defined window of 19–23 days after dose 1. In children 6 months–<2 years of age, the median (range) timing of dose 3 administration after dose 2 of BNT162b2 was 12.9 (8.6–20.0) and of placebo was 12.2 (8.4–20.0) weeks. In children 2–4 years of age, the median (range) timing of dose 3 administration after dose 2 of BNT162b2 was 10.7 (8.1–15.6) weeks and of placebo was 10.7 (8.6–16.0) weeks.

**Figure S1. Participant flow in the phase 1 study among participants (A) 6 months–<2 years of age and (B) 2–4 years of age**

The phase 1 study was conducted at 7 US sites.

**A 6 months–<2 years of age**

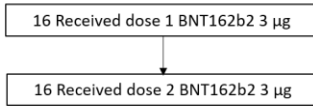

**B 2–4 years of age**

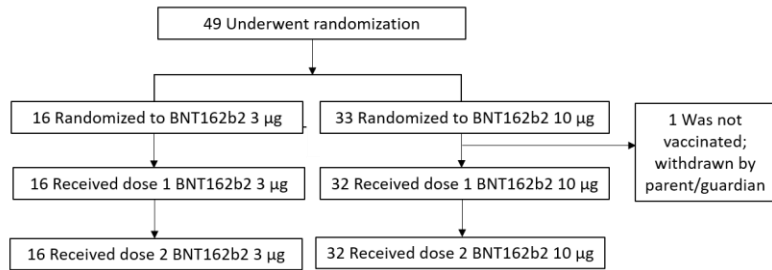

**Figure S2. Local reactions and systemic events in participants (A) 6 months–<2 years of age and (B) 2–4 years of age reported 7 days after administration of BNT162b2 in the phase 1 study**

The age-specific severity scales and descriptions for reactogenicity events for both age groups are summarized in **Table S4**. Fever categories are designated in the key. Error bars are the 95% CIs. The numbers above the bars show the percentage of participants in each group with the specified local reaction or systemic event. 3 μg=3 μg BNT162b2; 10 μg=10 μg BNT162b2; PD1=after dose 1; PD2=after dose 2.

**A**

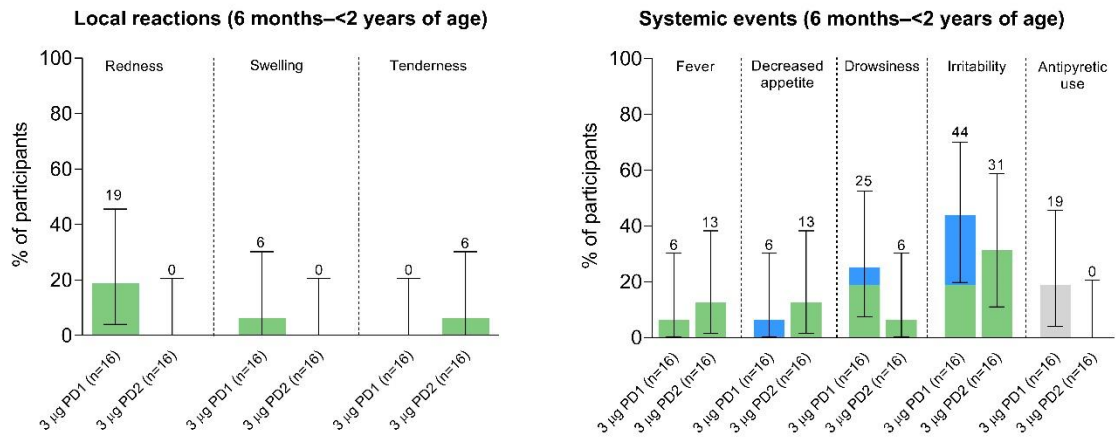

**B**

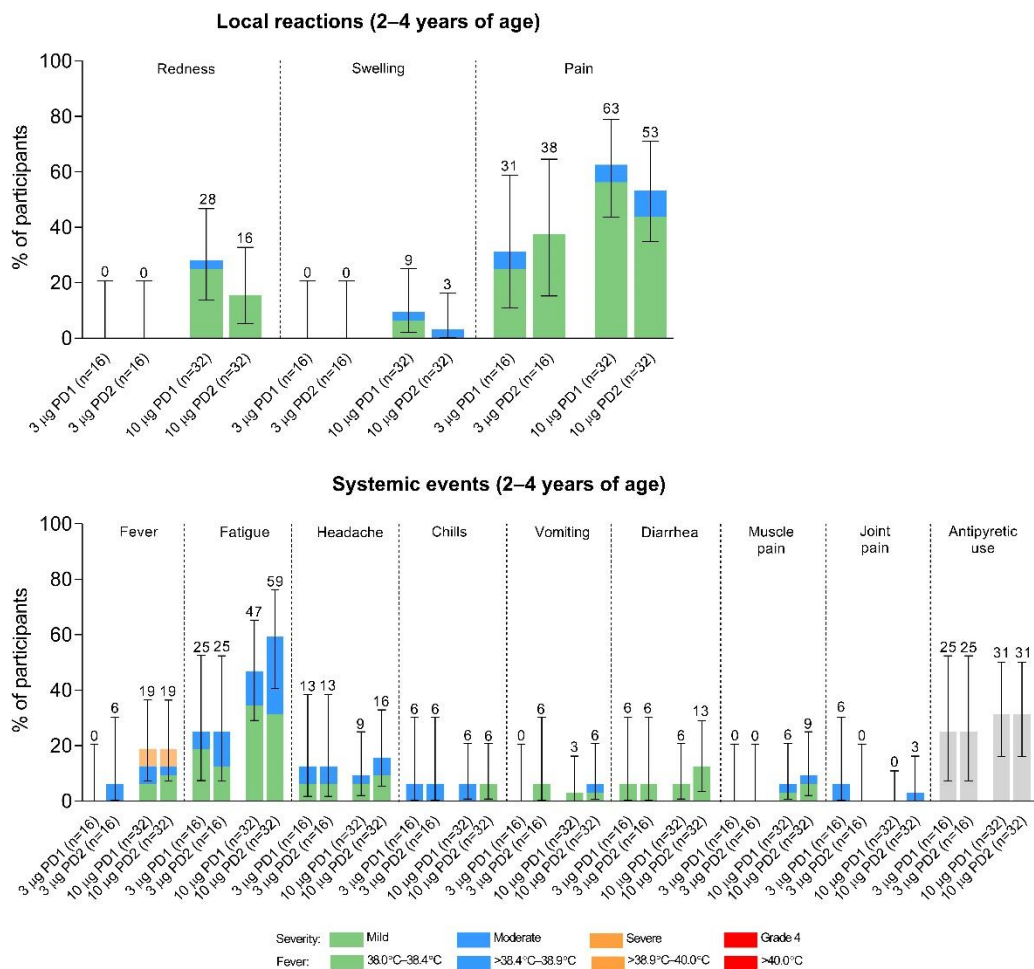

**Figure S3. Geometric mean and 95% CI for ancestral strain SARS-CoV-2 neutralizing titers 7 days after dose 2 in phase 1 participants 6 months–11 years of age and 1 month after dose 2 for participants 12–25 years of age from a previous phase 2/3 study**

Results are for the all-available immunogenicity population (Table S1).

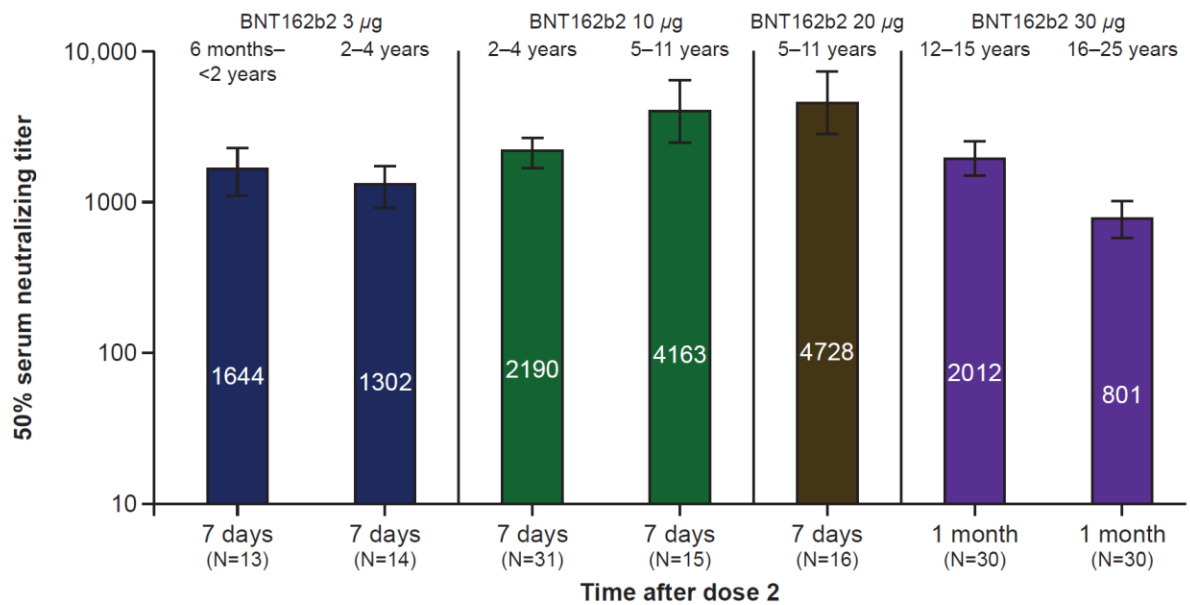

**Figure S4. Geometric means of ancestral strain SARS-CoV-2 neutralizing titers for participants 6 months–4 years and 16–25 years of age among BNT162b2 recipients**

The 50% neutralizing titers were determined in a validated microneutralization assay against ancestral SARS-CoV-2 strain (USA-WA1/2020). Results are for participants in the immunobridging subset of the dose 3 (for participants 6 months–4 years of age) and dose 2 (for participants 16–25 years of age) evaluable immunogenicity populations (**Table S1**) who had no serological or virological evidence of SARS-CoV-2 infection before the 1 month after dose 3 (for participants 6 months–4 years of age) or dose 2 (for participants 16–25 years of age) blood sample collection, and who had no COVID-19 medical history. Values within the bars are GMTs (95% CIs). The GMFR from before vaccination to 1 month after dose 3 (for all age groups) and from before to after dose 3 (for participants 6 months–<2 years and 2–4 years of age) are shown above the bars. GMTs, GMFRs, and 2-sided 95% CIs were calculated by exponentiating the mean logarithm of the titers or fold rises and the corresponding CIs (based on the Student *t* distribution). Assay results below the LLOQ were set to  $0.5 \times$  LLOQ. Corresponding GMTs for placebo recipients were 21–24 across timepoints and age groups. D1=dose 1; D3=dose 3; GMFR=geometric mean fold rise; GMT=geometric mean titer; LLOQ=lower limit of quantitation; PD2=after dose 2; PD3=after dose 3.

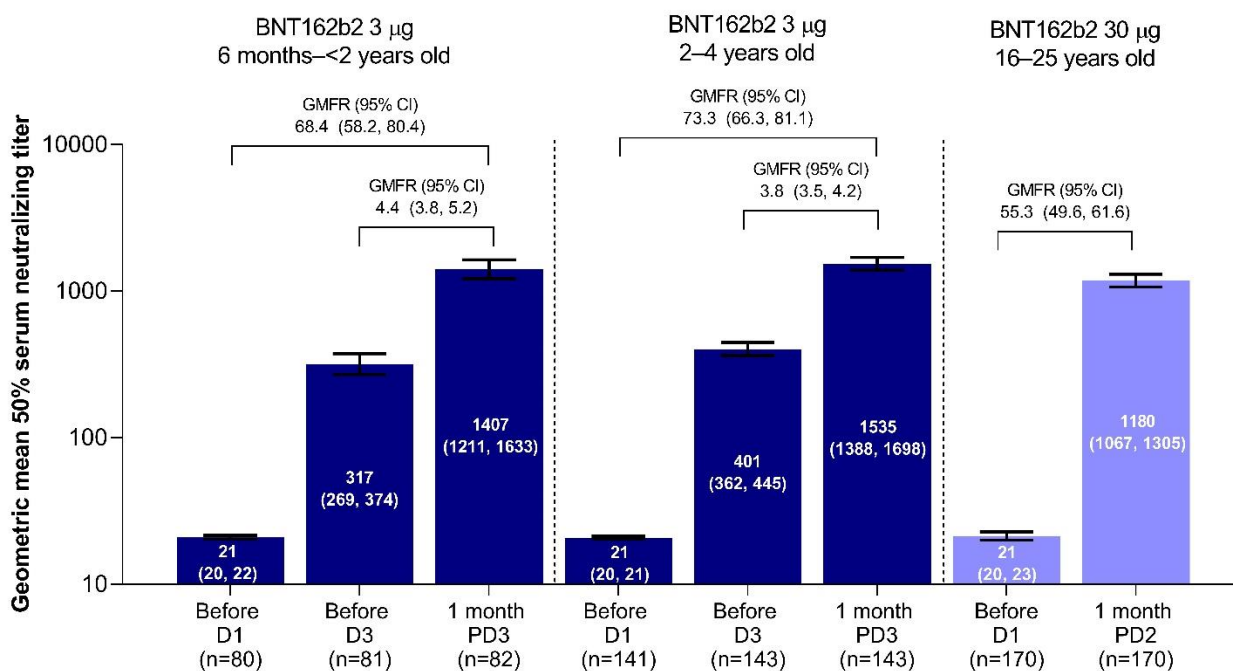

**Figure S5. Serum SARS-CoV-2 neutralization titers for the Omicron BA.1 sublineage after dose 3 in participants 6 months–<2 years, 2–4 years, and 18–50 years of age without evidence of prior SARS-CoV-2 infection who received dose 3 approximately 3 months after dose 2**

The 50% serum neutralizing titers against the Omicron BA.1 sublineage are shown. Values within the bars are GMTs (95% CIs). Assay results below the LLOQ were set to  $0.5 \times$  LLOQ. Results are in the Omicron neutralization subset (**Table S1**) and are based on an unvalidated fluorescent focus reduction neutralization test. Samples were tested contemporaneously for comparability. The adult reference group included participants 18–50 years of age from Study C4591017 (NCT04713553) who had received a third 30- $\mu$ g BNT162b2 dose at a median (range) of 13.0 (11.9–14.3) weeks after dose 2 and were without evidence of prior SARS-CoV-2 infection (ie, having negative N-binding antibody and negative nucleic acid amplification test results at dose 1, 1 month after dose 2, dose 3, and 1 month after dose 3 study visits). Dose 3 was administered at a median (range) of 12.9 (8.6–20.0) and 10.6 (8.6–13.7) weeks after dose 2 among participants 6 months–<2 years and 2–4 years of age, respectively. GMT=geometric mean titer; LLOQ=lower limit of quantitation; PD3=after dose 3.

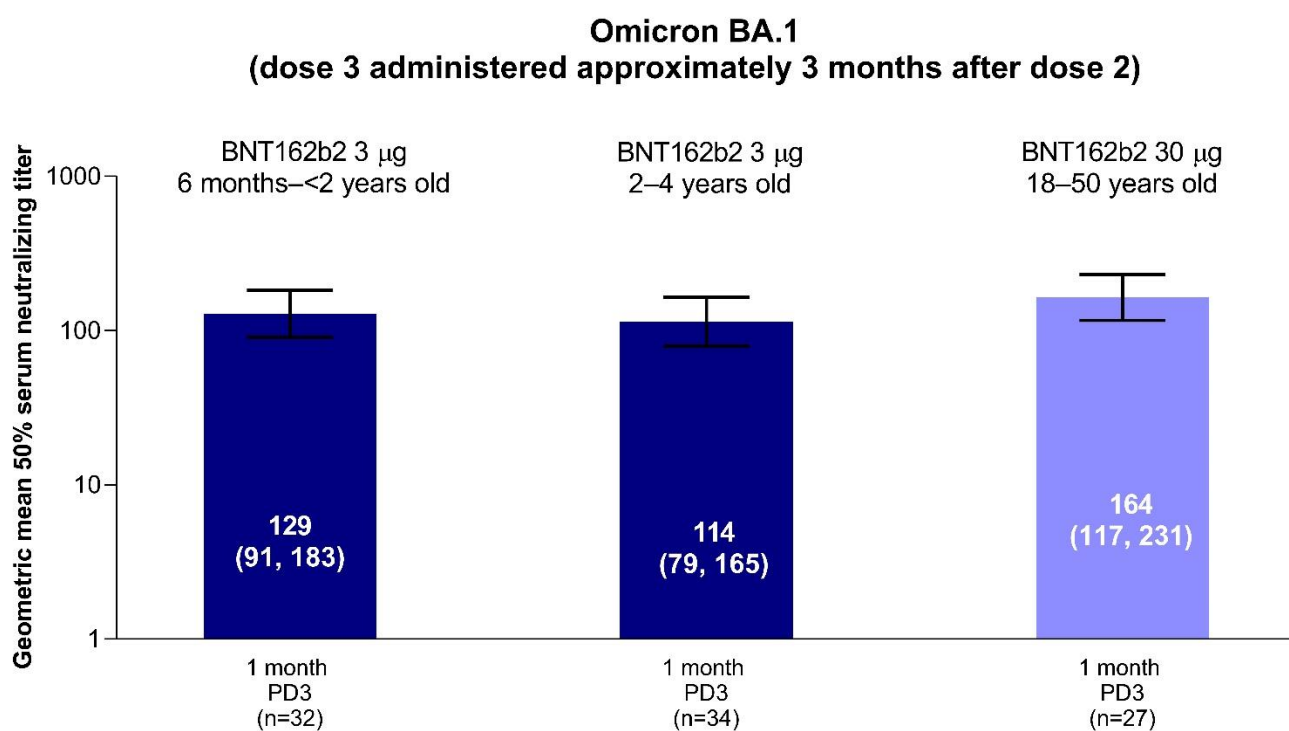

**Table S1. Study populations**

| <b>Population</b>               | <b>Description</b>                                                                                                                                                                                                                                                                                                                                                                                                                                                                                                                                                             |
|---------------------------------|--------------------------------------------------------------------------------------------------------------------------------------------------------------------------------------------------------------------------------------------------------------------------------------------------------------------------------------------------------------------------------------------------------------------------------------------------------------------------------------------------------------------------------------------------------------------------------|
| Enrolled                        | All participants who provided informed consent                                                                                                                                                                                                                                                                                                                                                                                                                                                                                                                                 |
| Randomized                      | All participants who were assigned a randomization number                                                                                                                                                                                                                                                                                                                                                                                                                                                                                                                      |
| Dose 2 evaluable immunogenicity | All eligible randomized participants who received two doses of the vaccine at the same dose level to which they were randomized, with dose 2 received within the predefined window (within 19–42 days after dose 1), having $\geq 1$ valid and determinate immunogenicity result after dose 2 from the blood sample collected within an appropriate window after dose 2 (within 6–8 days after dose 2 for phase 1 and within 28–42 days after dose 2 for phase 2/3), and having no other important protocol deviations as determined by the clinician                          |
| Dose 3 evaluable immunogenicity | All eligible randomized participants who received three doses of the vaccine at the same dose level to which they were randomized, with dose 2 received within the predefined window (within 19–42 days after dose 1), with dose 3 received within the predefined window ( $\geq 60$ days after dose 2), having $\geq 1$ valid and determinate immunogenicity result after dose 3 from the blood sample collected within an appropriate window after dose 3 (within 28–42 days after dose 3), and having no other important protocol deviations as determined by the clinician |
| All-available immunogenicity    | Dose 2 all-available: all randomized participants who received 2 doses of the vaccine with $\geq 1$ valid and determinate immunogenicity result after dose 2 from the blood sample collected at 1 month after dose 2 visit regardless of visit window<br><br>Dose 3 all-available: all randomized participants who received 3 doses of the vaccine with $\geq 1$ valid and determinate immunogenicity result after dose 3                                                                                                                                                      |
| Omicron neutralization subset   | For each of the pediatric groups, included ~40 BNT162b2 3- $\mu$ g recipients randomly selected from the post-dose 3 immunobridging subset (see definition in Immunobridging Analysis section of <b>Supplementary Appendix</b> ) who had received 3 vaccine doses and had sufficient blood volume for testing at dose 3 and 1 month after dose 3<br><br>The adult reference group was from the C4591017 study and included ~30 participants 18–50 years of age who had received a third 30- $\mu$ g BNT162b2 dose approximately 3 months after dose 2                          |
| Safety                          | All participants who received $\geq 1$ dose of the study intervention                                                                                                                                                                                                                                                                                                                                                                                                                                                                                                          |
| Evaluable efficacy              | Dose 2 evaluable efficacy: all eligible randomized participants who received all vaccination(s) at the same dose level to which they were randomized, with dose 2 received within the predefined window (within 19–42 days after dose 1), and having no other important protocol deviations as determined by the clinician on or before 7 days after dose 2                                                                                                                                                                                                                    |
| All-available efficacy          | Dose 1 all-available efficacy: all randomized participants who received $\geq 1$ vaccination<br><br>Dose 2 all-available efficacy: all randomized participants who completed 2 vaccination doses<br><br>Dose 3 all-available efficacy: all randomized participants who completed 3 vaccination doses                                                                                                                                                                                                                                                                           |



**Table S2. Demographic characteristics of phase 1 participants\***

| Characteristic                   | 6 months–<br><2 years of age |                            | 2–4 years of age            |                  |
|----------------------------------|------------------------------|----------------------------|-----------------------------|------------------|
|                                  | BNT162b2<br>3 µg<br>(N=16)   | BNT162b2<br>3 µg<br>(N=16) | BNT162b2<br>10 µg<br>(N=32) | Total<br>(N=48)  |
| Age at vaccination               |                              |                            |                             |                  |
| Mean (SD)                        | 15.4 (6.30) months           | 3.0 (0.73) years           | 3.1 (0.75) years            | 3.1 (0.74) years |
| Median (range)                   | 15.5 (6–23) months           | 3.0 (2–4) years            | 3.0 (2–4) years             | 3.0 (2–4) years  |
| Male, n (%)                      | 10 (62.5)                    | 9 (56.3)                   | 19 (59.4)                   | 28 (58.3)        |
| Race, n (%)                      |                              |                            |                             |                  |
| White                            | 14 (87.5)                    | 12 (75.0)                  | 26 (81.3)                   | 38 (79.2)        |
| Black or African American        | 0                            | 0                          | 2 (6.3)                     | 2 (4.2)          |
| American Indian or Alaska Native | 0                            | 0                          | 1 (3.1)                     | 1 (2.1)          |
| Asian                            | 1 (6.3)                      | 1 (6.3)                    | 2 (6.3)                     | 3 (6.3)          |
| Mutiracial                       | 1 (6.3)                      | 2 (12.5)                   | 1 (3.1)                     | 3 (6.3)          |
| Not reported                     | 0                            | 1 (6.3)                    | 0                           | 1 (2.1)          |
| Hispanic/Latinx, n (%)           | 3 (18.8)                     | 0                          | 1 (3.1)                     | 1 (2.1)          |
| Country, n (%)                   |                              |                            |                             |                  |
| United States                    | 16 (100.0)                   | 16 (100.0)                 | 32 (100.0)                  | 48 (100.0)       |

\* Results are for the safety population (**Table S1**).

**Table S3. Representativeness of phase 2/3 study participants\***

| Category                                           | Details                                                                                                                                                                                                                                                                                                                                                                                                                                                                                                                                                                                                                                                            |
|----------------------------------------------------|--------------------------------------------------------------------------------------------------------------------------------------------------------------------------------------------------------------------------------------------------------------------------------------------------------------------------------------------------------------------------------------------------------------------------------------------------------------------------------------------------------------------------------------------------------------------------------------------------------------------------------------------------------------------|
| Disease, problem, or condition under investigation | COVID-19 in children younger than 5 years                                                                                                                                                                                                                                                                                                                                                                                                                                                                                                                                                                                                                          |
| Special considerations related to                  |                                                                                                                                                                                                                                                                                                                                                                                                                                                                                                                                                                                                                                                                    |
| Sex and gender                                     | COVID-19 rates are similar between male and female children <5 years of age. <sup>1</sup> Limited data are available on the relationship between gender identity and COVID-19. <sup>2</sup>                                                                                                                                                                                                                                                                                                                                                                                                                                                                        |
| Age                                                | COVID-19 cases are generally of similar prevalence across age groups. <sup>1</sup> However, in the first 2 weeks of 2022, which corresponded to the peak of the omicron variant wave in the United States, there were 1009 weekly cases per 100,000 population in those 0–4 years of age compared with 1705 weekly cases per 100,000 in the general population and 768 weekly cases per 100,000 population of those ≥75 years of age. <sup>3</sup> However, the US COVID-19-incident deaths were highest in older populations (51 per 100,000 population ≥75 years of age) and lower in young children (0.14 per 100,000 population <5 years of age). <sup>3</sup> |
| Race or ethnic group                               | While COVID-19 affects all races and ethnicities, racial and ethnic minority populations are at increased risk for COVID-19-associated hospitalization and mortality. <sup>1,4</sup> Among children <5 years of age, the highest weekly cases in the first 2 weeks of 2022 were in American Indian/Alaska Native populations (771 per 100,000 population) and the lowest in White populations (530 per 100,000 population). <sup>3</sup>                                                                                                                                                                                                                           |
| Geography                                          | COVID-19 cases have been reported worldwide, although the number of cases and deaths have varied by country/region. <sup>5</sup> As of June 15, 2022, the number of COVID-19 cases and attributed deaths in the United States were >84 million and >1 million, respectively.                                                                                                                                                                                                                                                                                                                                                                                       |
| Other considerations                               | Not applicable                                                                                                                                                                                                                                                                                                                                                                                                                                                                                                                                                                                                                                                     |
| Overall representativeness of this trial           | The participants included in this study were younger than 5 years. The proportion of male and female children was 50:50. The study disproportionately included White participants (79%), with 4% and 13% of participants of Black/African American and Hispanic/Latinx race/ethnicity, respectively. The study was conducted in Brazil, Finland, Poland, Spain, and the United States, with 81% of participants from the United States, which has reported high numbers of COVID-19 cases and deaths.                                                                                                                                                              |

1. US Centers for Disease Control and Prevention. Risk for COVID-19 infection, hospitalization, and death by age group. Updated November 22, 2021. <https://www.cdc.gov/coronavirus/2019-ncov/covid-data/investigations-discovery/hospitalization-death-by-age.html>. Accessed May 18, 2022.
2. Morgan et al. *Front Sociol.* 2021;6:650729.
3. US Centers for Disease Control and Prevention. COVID Data Tracker. COVID-19 Weekly Cases and Deaths per 100,000 Population by Age, Race/Ethnicity, and Sex. <https://covid.cdc.gov/covid-data-tracker/#demographicsovertime>. Accessed May 18, 2022.
4. Khanijahani et al. *Int J Equity Health.* 2021;20:248.
5. World Health Organization. WHO Coronavirus (COVID-19) Dashboard. <https://covid19.who.int/>. Accessed June 16, 2022.

\* A literature search of PubMed and government sources was conducted to determine the representativeness of the participant population to the population of individuals with COVID-19.

**Table S4. Severity scale for local reactions and systemic events**

|                                          | <b>Mild</b>                                                                  | <b>Moderate</b>                                     | <b>Severe</b>                                        | <b>Grade 4</b>                  |
|------------------------------------------|------------------------------------------------------------------------------|-----------------------------------------------------|------------------------------------------------------|---------------------------------|
| <b>Local reaction</b>                    |                                                                              |                                                     |                                                      |                                 |
| <b>&lt;2 years of age</b>                |                                                                              |                                                     |                                                      |                                 |
| Tenderness                               | Hurts if gently touched<br>(eg, whimpers, winces, protests,<br>or withdraws) | Hurts if gently touched with<br>crying              | Causes limitation of limb<br>movement                | ER visit or hospitalization     |
| Redness                                  | 1–4 caliper units (0.5–2.0 cm)                                               | 5–14 caliper units (>2.0–7.0 cm)                    | >14 caliper units (>7 cm)                            | Necrosis/exfoliative dermatitis |
| Swelling                                 | 1–4 caliper units (0.5–2.0 cm)                                               | 5–14 caliper units (>2.0–7.0 cm)                    | >14 caliper units (>7 cm)                            | Necrosis                        |
| <b>2–4 years of age</b>                  |                                                                              |                                                     |                                                      |                                 |
| Pain                                     | Does not interfere with activity                                             | Interferes with activity                            | Prevents daily activity                              | ER visit or hospitalization     |
| Redness                                  | 1–4 caliper units (0.5–2.0 cm)                                               | 5–14 caliper units (>2.0–7.0 cm)                    | >14 caliper units (>7 cm)                            | Necrosis/exfoliative dermatitis |
| Swelling                                 | 1–4 caliper units (0.5–2.0 cm)                                               | 5–14 caliper units (>2.0–7.0 cm)                    | >14 caliper units (>7 cm)                            | Necrosis                        |
| <b>Systemic event</b>                    |                                                                              |                                                     |                                                      |                                 |
| <b>&lt;2 years of age</b>                |                                                                              |                                                     |                                                      |                                 |
| Decreased appetite<br>(loss of appetite) | Decreased interest in eating                                                 | Decreased oral intake                               | Refusal to eat                                       | ER visit or hospitalization     |
| Drowsiness<br>(increased sleep)          | Increased or prolonged sleep<br>bouts                                        | Slightly subdued interfering with<br>daily activity | Disabling; not interested in<br>usual daily activity | ER visit or hospitalization     |
| Irritability<br>(fussiness)*             | Easily consolable                                                            | Requiring increased attention                       | Inconsolable; crying cannot be<br>comforted          | ER visit or hospitalization     |
| <b>2–4 years of age</b>                  |                                                                              |                                                     |                                                      |                                 |
| Vomiting                                 | 1–2 times in 24 hours                                                        | >2 times in 24 hours                                | Requires IV hydration                                | ER visit or hospitalization     |
| Diarrhea                                 | 2–3 loose stools/24 hours                                                    | 4–5 loose stools/24 hours                           | ≥6 loose stools/24 hours                             | ER visit or hospitalization     |
| Headache                                 | Does not interfere with activity                                             | Some interference with activity                     | Prevents daily routine activity                      | ER visit or hospitalization     |
| Fatigue/tiredness                        | Does not interfere with activity                                             | Some interference with activity                     | Prevents daily routine activity                      | ER visit or hospitalization     |
| Chills                                   | Does not interfere with activity                                             | Some interference with activity                     | Prevents daily routine activity                      | ER visit or hospitalization     |
| Muscle pain                              | Does not interfere with activity                                             | Some interference with activity                     | Prevents daily routine activity                      | ER visit or hospitalization     |
| Joint pain                               | Does not interfere with activity                                             | Some interference with activity                     | Prevents daily routine activity                      | ER visit or hospitalization     |

ER=emergency room; IV=intravenous.

For the fever scale, refer to the legend and scale of **Figure 2** and **Figure S2**.

\*Synonymous with restless sleep or decreased sleep.

**Table S5. Phase 1 participants reporting  $\geq 1$  adverse event from dose 1 to 1 month after dose 2**

| Adverse event                                | 6 months–<2 years<br>of age                                      | 2–4 years of age                                                 |                                                                   |
|----------------------------------------------|------------------------------------------------------------------|------------------------------------------------------------------|-------------------------------------------------------------------|
|                                              | BNT162b2 3 $\mu$ g<br>(N <sup>†</sup> =16)<br>n <sup>‡</sup> (%) | BNT162b2 3 $\mu$ g<br>(N <sup>†</sup> =16)<br>n <sup>‡</sup> (%) | BNT162b2 10 $\mu$ g<br>(N <sup>†</sup> =32)<br>n <sup>‡</sup> (%) |
| Any event                                    | 2 (12.5)                                                         | 4 (25.0)                                                         | 12 (37.5)                                                         |
| Related <sup>§</sup>                         | 1 (6.3)                                                          | 2 (12.5)                                                         | 7 (21.9)                                                          |
| Severe                                       | 0                                                                | 0                                                                | 0                                                                 |
| Life-threatening                             | 0                                                                | 0                                                                | 0                                                                 |
| Any serious adverse event                    | 0                                                                | 0                                                                | 0                                                                 |
| Any adverse event leading to discontinuation | 0                                                                | 0                                                                | 0                                                                 |
| Death                                        | 0                                                                | 0                                                                | 0                                                                 |

Results are for the safety population (Table S1).

<sup>†</sup> Number of participants in the specified group. This value is the denominator for the percentage calculations.

<sup>‡</sup> Number of participants reporting  $\geq 1$  occurrence of the specified event category. For ‘any event’, n=the number of participants reporting  $\geq 1$  occurrence of any event.

<sup>§</sup> Assessed by the investigator as related to the investigational product.

**Table S6. Phase 2/3 participants reporting  $\geq 1$  adverse event from dose 1 to 1 month after dose 3**

| Adverse event                           | 6 months–<2 years of age |                    | 2–4 years of age    |                    |
|-----------------------------------------|--------------------------|--------------------|---------------------|--------------------|
|                                         | BNT162b2 3 $\mu$ g       | Placebo            | BNT162b2 3 $\mu$ g  | Placebo            |
|                                         | (N*=1178)<br>n† (%)      | (N*=598)<br>n† (%) | (N*=1835)<br>n† (%) | (N*=915)<br>n† (%) |
| Any adverse event                       | 355 (30.1)               | 162 (27.1)         | 344 (18.7)          | 171 (18.7)         |
| Related‡                                | 55 (4.7)                 | 21 (3.5)           | 37 (2.0)            | 18 (2.0)           |
| Severe                                  | 12 (1.0)                 | 10 (1.7)           | 9 (0.5)             | 6 (0.7)            |
| Life-threatening                        | 0                        | 1 (0.2)§           | 0                   | 0                  |
| Any serious adverse event               | 17 (1.4)                 | 14 (2.3)           | 12 (0.7)            | 8 (0.9)            |
| Related‡                                | 0                        | 1 (0.2)            | 1 (0.1)             | 0                  |
| Severe                                  | 8 (0.7)                  | 9 (1.5)            | 5 (0.3)             | 3 (0.3)            |
| Life-threatening                        | 0                        | 1 (0.2)§           | 0                   | 0                  |
| Any adverse event leading to withdrawal | 3 (0.3)                  | 0                  | 3 (0.2)             | 1 (0.1)            |
| Related‡                                | 3 (0.3)                  | 0                  | 2 (0.1)             | 1 (0.1)            |
| Serious                                 | 0                        | 0                  | 1 (0.1)             | 0                  |
| Severe                                  | 1 (0.1)                  | 0                  | 1 (0.1)             | 1 (0.1)            |
| Life-threatening                        | 0                        | 0                  | 0                   | 0                  |
| Death                                   | 0                        | 0                  | 0                   | 0                  |

Results are for the safety population (Table S1).

\* Number of participants in the specified group. This value is the denominator for the percentage calculations.

† Number of participants reporting  $\geq 1$  occurrence of the specified event category. For ‘any event’, n=the number of participants reporting  $\geq 1$  occurrence of any event.

‡ Assessed by the investigator as related to the investigational product.

§ Grade 4 adverse event (thermal burn).

**Table S7. Vaccine efficacy by variant of concern in phase 2/3 participants based on first COVID-19 occurrence from 7 days after dose 3**

| Variant of concern | BNT162b2<br>(N=873*) |                             | Placebo<br>(N=381*) |                             | Vaccine efficacy<br>(95% CI) |
|--------------------|----------------------|-----------------------------|---------------------|-----------------------------|------------------------------|
|                    | n1†                  | Surveillance time‡<br>(n2§) | n1†                 | Surveillance time‡<br>(n2§) |                              |
| Overall            | 13                   | 0.124 (794)                 | 21                  | 0.054 (351)                 | 73.2% (43.8, 87.6)           |
| Omicron            | 13                   | 0.124 (794)                 | 20                  | 0.054 (351)                 | 71.8% (40.5, 87.1)           |
| Omicron BA.1.1     | 0                    | 0.124 (794)                 | 1                   | 0.054 (351)                 | 100.0% (-1591.3, 100.0)      |
| Omicron BA.2       | 2                    | 0.124 (794)                 | 8                   | 0.054 (351)                 | 89.2% (45.7, 98.9)           |
| Omicron BA.2.10    | 0                    | 0.124 (794)                 | 1                   | 0.054 (351)                 | 100.0% (-1591.3, 100.0)      |
| Omicron BA.2.12.1  | 6                    | 0.124 (794)                 | 9                   | 0.054 (351)                 | 71.1% (9.1, 91.5)            |
| Omicron BA.2.21    | 1                    | 0.124 (794)                 | 0                   | 0.054 (351)                 | Undefined                    |
| Omicron BA.4       | 2                    | 0.124 (794)                 | 1                   | 0.054 (351)                 | 13.3% (-5016.9, 95.5)        |
| Omicron BA.5       | 2                    | 0.124 (794)                 | 0                   | 0.054 (351)                 | Undefined                    |
| Unknown            | 0                    | 0.124 (794)                 | 1                   | 0.054 (351)                 | 100.0% (-1591.3, 100.0)      |

Cutoff date was June 17, 2022. Data are for participants without evidence of SARS-CoV-2 infection before 7 days after dose 3 in the evaluable efficacy population (**Table S1**). Two-sided 95% CI for vaccine efficacy was derived based on the Clopper and Pearson method adjusted for surveillance time.

\* Number of participants in the specified group.

† Number of participants meeting the specified endpoint.

‡ Total surveillance time in 1000 person-years for the given endpoint across all participants within each group at risk for the endpoint. Time period for COVID-19 case accrual is from 7 days after dose 3 to the end of the surveillance period.

§ Number of participants at risk for the endpoint.

Results are for the evaluable efficacy population in participants without evidence of previous SARS-CoV-2 infection (**Table S1**). Two-sided 95% CI for vaccine efficacy is derived based on the Clopper and Pearson method adjusted for surveillance time.

\* Number of participants in the specified group.

† Number of participants meeting the endpoint definition.

‡ Total surveillance time in 1000 person-years for the given endpoint across all participants within each group at risk for the endpoint.

§ Number of participants at risk for the endpoint.

|| COVID-19 cases missing sequencing data were assigned as Delta variant if illness onset date was before December 20, 2021, or Omicron variant if illness onset date was on or after December 20, 2021.
